# Supplementary material for: Screening and identification of genes associated with flight muscle histolysis of the house cricket Acheta domesticus
Source: Frontiers journal article supplement (doi:10.3389/fphys.2022.1079328), 2023-01-11
Supplement: Image_1.pdf [file Image_1.pdf]

## *Supplementary Material*

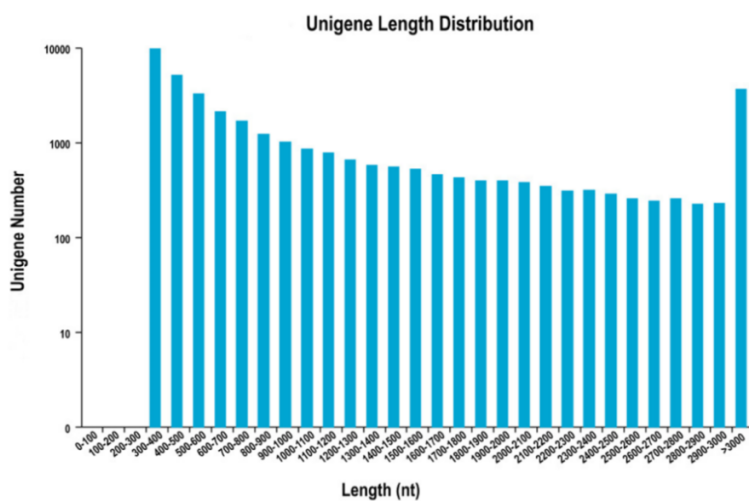

**Supplementary Figure 1.** The distribution of unigene length.
