# Supplementary material for: Screening and identification of genes associated with flight muscle histolysis of the house cricket Acheta domesticus
Source: Frontiers journal article supplement (doi:10.3389/fphys.2022.1079328), 2023-01-11
Supplement: Image_2.pdf [file Image_2.pdf]

## Supplementary Material

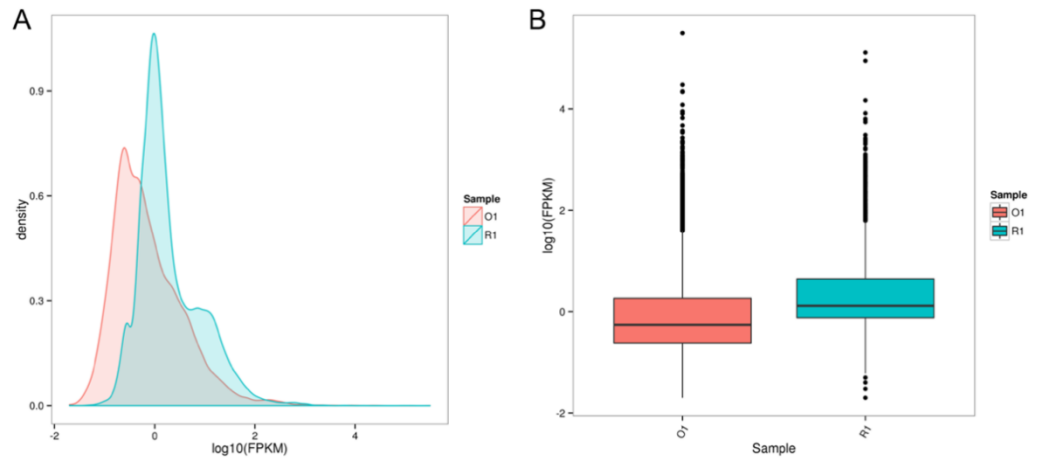

**Supplementary Figure 2.** General distribution of gene expression before and after flight muscle histolysis in *A. domesticus*. (A) Density distribution curve based on the FPKM values; (B) Box plot of the FPKM values.
