# Supplementary material for: Screening and identification of genes associated with flight muscle histolysis of the house cricket Acheta domesticus
Source: Frontiers journal article supplement (doi:10.3389/fphys.2022.1079328), 2023-01-11
Supplement: Image_3.pdf [file Image_3.pdf]

## Supplementary Material

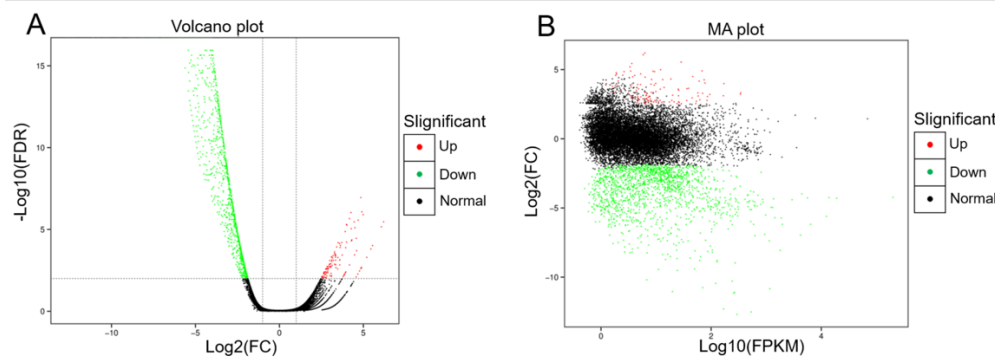

**Supplementary Figure 3.** The DEG analysis of the comparison between before and after flight muscle histolysis in *A. domesticus*. (A) Volcano plot of the comparison; (B) MA plot of the comparison. Most DEGs were downregulated after flight muscle histolysis.
