# Supplementary material for: Screening and identification of genes associated with flight muscle histolysis of the house cricket Acheta domesticus
Source: Frontiers journal article supplement (doi:10.3389/fphys.2022.1079328), 2023-01-11
Supplement: Image_4.pdf [file Image_4.pdf]

## Supplementary Material

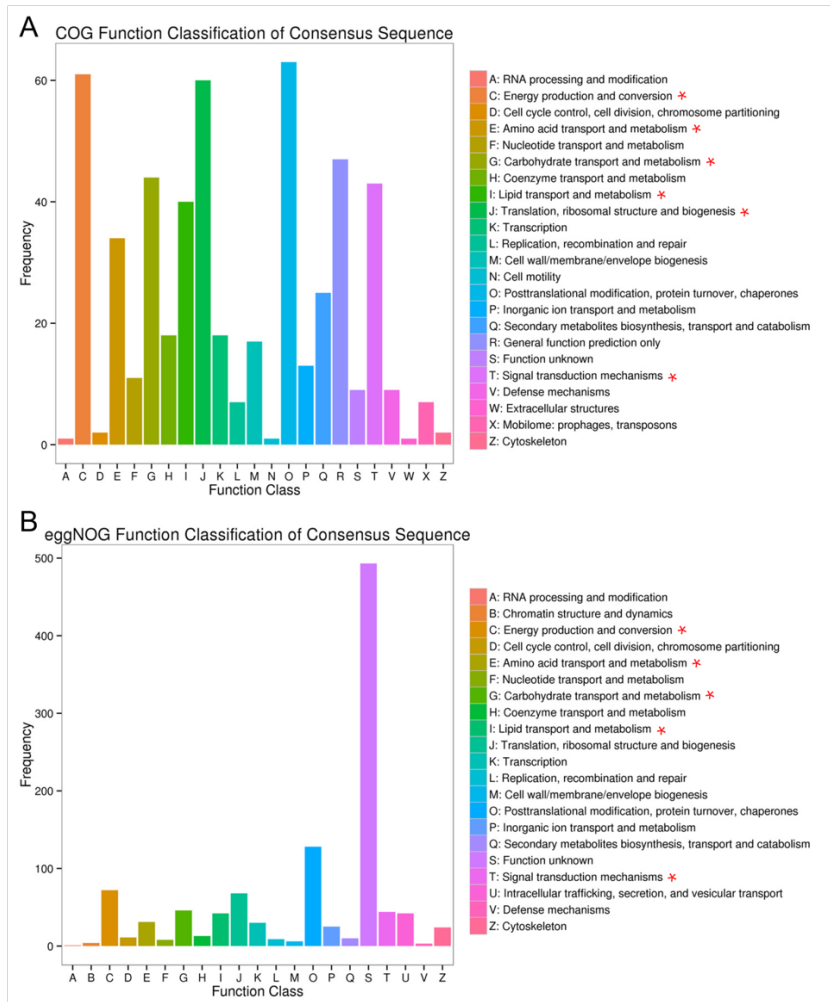

**Supplementary Figure 4.** DEG direct homology classification according to (A) CGO classification; (B) eggNOG classification.
