# Supplementary material for: Screening and identification of genes associated with flight muscle histolysis of the house cricket Acheta domesticus
Source: Frontiers journal article supplement (doi:10.3389/fphys.2022.1079328), 2023-01-11
Supplement: Image_5.pdf [file Image_5.pdf]

# Supplementary Material

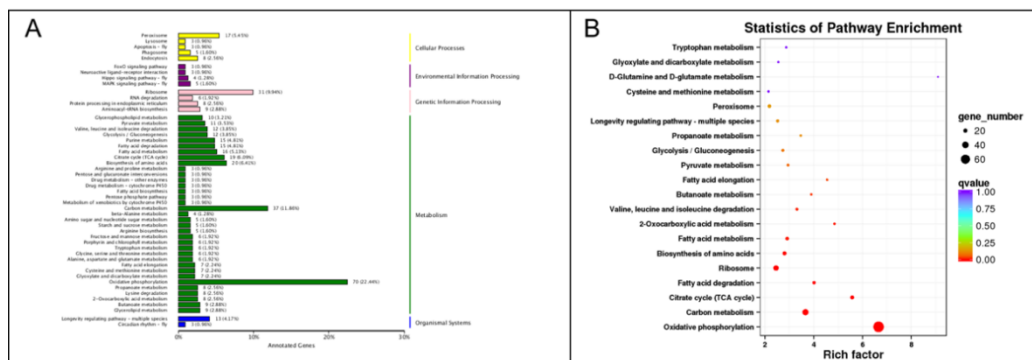

**Supplementary Figure 5.** The DEGs related to flight muscle histolysis in *A. domesticus*. (A) KEGG classification map; (B) KEGG scatter plots.
